# Supplementary material for: Effects of Nanoparticle Size and Radiation Energy on Copper-Cysteamine Nanoparticles for X-ray Induced Photodynamic Therapy
Source: PubMed Central journal article supplement (PMC7353381; doi:10.3390/nano10061087), 2020-06-01
Supplement: nanomaterials-10-01087-s001.pdf [file nanomaterials-10-01087-s001.pdf]

## Supplementary Materials:

# Effects of Nanoparticle Size and Radiation Energy on Copper-Cysteamine Nanoparticles for X-ray Induced Photodynamic Therapy

**Table S1.** List of mice (identified by ear tag number), treatment variables (nanoparticle size and radiation energy) and reason for eventual euthanasia.

| Mouse Number | Reason for Euthanasia | Radiation Energy | Nanoparticle Size |
|--------------|-----------------------|------------------|-------------------|
| 359          | Large tumor           | 90 kVp           | Smallest          |
| 361          | One month             | 90 kVp           | Middle            |
| 379          | Large tumor           | 90 kVp           | Smallest          |
| 380          | Large tumor           | 90 kVp           | Smallest          |
| 381          | Large tumor           | 90 kVp           | Smallest          |
| 382          | Necrotic              | 90 kVp           | Smallest          |
| 383          | Necrotic              | 90 kVp           | Smallest          |
| 402          | One month             | 90 kVp           | Middle            |
| 405          | One month             | 90 kVp           | Middle            |
| 407          | Necrotic              | 90 kVp           | Middle            |
| 409          | Necrotic              | 250 kVp          | Smallest          |
| 414          | Large tumor           | 250 kVp          | Smallest          |
| 416          | Necrotic              | 250 kVp          | Smallest          |
| 417          | One month             | 250 kVp          | Smallest          |
| 419          | Large tumor           | 250 kVp          | Smallest          |
| 421          | Large tumor           | 250 kVp          | Smallest          |
| 422          | Large tumor           | 250 kVp          | Smallest          |
| 425          | Large tumor           | 250 kVp          | Smallest          |
| 428          | Large tumor           | 90 kVp           | Largest           |
| 429          | One month             | 90 kVp           | Largest           |
| 430          | Large tumor           | 90 kVp           | Largest           |
| 431          | Large tumor           | 90 kVp           | Largest           |
| 437          | Large tumor           | 350 kVp          | Smallest          |
| 438          | Large tumor           | 350 kVp          | Smallest          |
| 439          | Necrotic              | 350 kVp          | Smallest          |
| 448          | Large tumor           | 90 kVp           | Smallest          |
| 449          | Large tumor           | 90 kVp           | Smallest          |
| 450          | Large tumor           | 90 kVp           | Middle            |
| 451          | One month             | 90 kVp           | Middle            |
| 452          | One month             | 90 kVp           | Middle            |
| 453          | One month             | 90 kVp           | Largest           |
| 454          | Large tumor           | 350 kVp          | Smallest          |
| 455          | Necrotic              | 350 kVp          | Smallest          |
| 456          | Necrotic              | 350 kVp          | Smallest          |
| 457          | Necrotic              | 350 kVp          | Smallest          |
| 465          | Large tumor           | 250 kVp          | Smallest          |
| 466          | Necrotic              | 250 kVp          | Smallest          |

|     |             |         |          |
|-----|-------------|---------|----------|
| 469 | Necrotic    | 90 kVp  | Largest  |
| 470 | One month   | 90 kVp  | Largest  |
| 471 | One month   | 90 kVp  | Largest  |
| 472 | Necrotic    | 90 kVp  | Middle   |
| 473 | One month   | 90 kVp  | Middle   |
| 474 | One month   | 90 kVp  | Smallest |
| 476 | Necrotic    | 90 kVp  | Smallest |
| 477 | One month   | 90 kVp  | Middle   |
| 478 | One month   | 90 kVp  | Largest  |
| 480 | Necrotic    | 350 kVp | Smallest |
| 481 | Large tumor | 350 kVp | Smallest |
| 484 | Large tumor | 350 kVp | Smallest |
| 486 | Necrotic    | 350 kVp | Smallest |
| 487 | Large tumor | 350 kVp | Smallest |
| 488 | Large tumor | 90 kVp  | Largest  |
| 489 | Large tumor | 90 kVp  | Largest  |
| 500 | Necrotic    | 90 kVp  | Largest  |
| 607 | One month   | 90 kVp  | Middle   |
| 608 | One month   | 90 kVp  | Middle   |
| 609 | One month   | 90 kVp  | Middle   |
| 611 | One month   | 90 kVp  | Smallest |
| 612 | One month   | 90 kVp  | Smallest |
| 613 | One month   | 90 kVp  | Smallest |
